# Supplementary material
Source: Research Square preprint supplement (doi:10.21203/rs.3.rs-9833016/v1)
Supplement: Supplementary file 1 [file 327cfbc1e1673cf702adadd5.docx]

**Additional file 1.**

**Perceived scarcity and risky choice under high objective risk: Evidence from a hierarchical drift diffusion model**

## **A. Scarcity-manipulation questionnaire and scoring**

## Following completion of the main task, participants completed a brief retrospective manipulation-check questionnaire assessing their subjective experiences in the resource-scarcity and resource-rich contexts. The original questionnaire was administered in Chinese; the wording reproduced below is a faithful English translation of the participant-facing items. All items were rated on a 9-point Likert scale ranging from 1 (strongly disagree) to 9 (strongly agree).

## **Table A1. Scarcity-manipulation items and scoring.**

| **Construct** | **Resource-scarcity context (2-s context)** | **Resource-rich context (7-s context)** |
| --- | --- | --- |
| Perceived resource availability | When I had only 2 seconds available, I felt that time was extremely scarce. | When I had 7 seconds available, I felt that I had ample time. |
| Stress | When I had only 2 seconds available, I felt a great deal of psychological pressure. | When I had 7 seconds available, I felt almost no pressure. |
| Excitement | When I had only 2 seconds available, I felt emotionally aroused, tense, or excited. | When I had 7 seconds available, I felt calm and relaxed. |
| Motivation | When I had only 2 seconds available, I felt more driven and more motivated to complete the task. | When I had 7 seconds available, my motivation to act was clearly reduced. |
| Confidence | When I had only 2 seconds available, I lacked confidence in whether I could complete the task. | When I had 7 seconds available, I felt confident about my performance. |

*Note. Response scale for all items 1 = strongly disagree, 9 = strongly agree. The original Chinese questionnaire contained one item per construct in each context, yielding five paired ratings in total.*

**B. BIS-11 administration details**

## Trait impulsivity was assessed using the Chinese version of the Barratt Impulsiveness Scale–11 (BIS-11), administered after the scarcity-manipulation questionnaire. The original instrument was presented in Chinese. The English wording below is a faithful translation of the items that appeared in the study materials. Each item was rated on a 4-point scale: 1 = rarely or never, 2 = occasionally, 3 = often, and 4 = almost always or always. In the main manuscript, the BIS-11 was treated as a secondary individual-differences measure rather than the primary theoretical test.

## Response instructions: Participants were instructed as follows: “Please indicate the extent to which you agree or disagree with each of the following statements. Please do not think for too long before answering; in most cases, your first inclination is also the best one.”

## **Table B1. Chinese BIS-11 items used in the study (English translation).**

| **num** | **items** |
| --- | --- |
| 1 | I arrange everything carefully. |
| 2 | I make plans for the future. |
| 3 | I save money regularly. |
| 4 | I make plans for work and earning income. |
| 5 | I act rationally. |
| 6 | I maintain regular routines in eating and daily life. |
| 7 | I arrange everything before leaving home. |
| 8 | I complete tasks according to plan. |
| 9 | I spend money in a planned way. |
| 10 | I place great importance on planning for the future. |
| 11 | I act without thinking. |
| 12 | I cannot control my behavior very well. |
| 13 | I find it difficult to control my temper. |
| 14 | I speak without thinking. |
| 15 | When emotionally aroused, I find it difficult to control my behavior. |
| 16 | I tend to act impulsively. |
| 17 | I act immediately without considering the consequences. |
| 18 | I am prone to impulsive shopping. |
| 19 | I act rashly. |
| 20 | I do whatever comes to mind immediately. |
| 21 | When I encounter a problem, I can come up with good solutions. |
| 22 | When necessary, I can think about a problem for a long time. |
| 23 | I can consider a problem from different perspectives. |
| 24 | When I encounter a problem, I prefer to think it through slowly. |
| 25 | When faced with a difficult problem, I can patiently think of ways to solve it. |
| 26 | Before making a decision, I like to carefully weigh the gains and losses. |
| 27 | I think about problems calmly. |
| 28 | I am indecisive when dealing with matters. |
| 29 | I can concentrate when thinking about a problem. |
| 30 | I readily come up with new ways to solve difficulties. |

## Scoring. Scoring followed the procedure for the validated Chinese BIS-11 version used in this study, including reverse coding where required by that version, and responses were aggregated to yield an overall impulsivity score. As reported in the main manuscript, higher scores indicated greater impulsivity, and the scale showed good internal consistency in the present sample (Cronbach's alpha = .92).

## To maintain consistency across the manuscript, it is useful to distinguish between two numerically equivalent representations of the same construct. In the exploratory GLMM described in the main text, BIS was entered as the standardized total BIS score. In Figure 4D and the corresponding individual-differences analysis, the x-axis was described as the participant's mean BIS item score. Because the mean item score is a linear rescaling of the total score, these two representations are fully equivalent for correlational and regression purposes and do not change the substantive interpretation of the results.

## **Candidate model set and DIC comparison**

Supplementary Fig. 1 summarizes the full candidate model set. The null model allowed no condition-dependent variation in the main DDM parameters. Single-parameter models then allowed either drift rate (v), starting bias (z), or threshold (a) to vary as a function of either InitialValue (resource-rich vs. resource-scarcity context) or risk (ambiguous, low-risk, high-risk). Two intermediate models allowed drift rate to vary by risk while either starting bias or threshold varied by InitialValue. The most complex candidate model, Model M3, allowed drift rate to vary as a function of the Risk Type × Resource Context interaction. This interaction model provided the best fit to the data by a substantial margin.

**Supplementary Fig. 1**

*Candidate-model comparison based on DIC.*





As shown in Supplementary Fig. 1, Model M3 yielded the lowest DIC and therefore the strongest empirical support among the tested models. The improvement over the next-best model (M2a) was large (ΔDIC = 796.23), indicating that allowing drift rate to vary as a function of the full Risk Type × Resource Context interaction captured substantial structure in the data beyond models that allowed only additive or partially distributed condition effects. This ranking supports the interpretation reported in the main text: the behavioral differences across conditions were best accounted for by condition-dependent variation in evidence accumulation toward the risky-choice boundary, rather than by models emphasizing threshold adjustment or starting-point bias alone.

The posterior density plots showed highly overlapping chain distributions for the intercept and the main drift-rate regression coefficients, and the corresponding trace plots showed no evidence of systematic drift, nonstationarity, or chain separation. The same pattern was observed for the interaction terms, although the high-risk interaction coefficient displayed slightly greater local variability than the other drift components, which is expected for a smaller-effect interaction term. Overall, the trace plots were consistent with the numerical convergence diagnostics and supported the adequacy of the retained posterior samples for inference.

The left column shows posterior densities from the four chains, and the right column shows the corresponding MCMC traces. Across parameters, the chains showed substantial overlap in the posterior distributions and stable trace behavior, consistent with adequate convergence.

**Supplementary Fig. 2**

*Posterior density plots and trace plots for the core drift-rate parameters in Model M3.*
